# Supplementary material
Source: ML conference proceedings conference paper supplement (https://proceedings.neurips.cc/paper_files/paper/2018/hash/28a543c2a9eee8c0d6fbfaff7ca7e224-Abstract.html)
Supplement: Supplementary file [file 28a543c2a9eee8c0d6fbfaff7ca7e224-Supplemental.zip]

---

# Bayesian multi-domain learning for cancer subtype discovery from next-generation sequencing count data

---

**Ehsan Hajiramezanali**  
Texas A&M University  
ehsanr@tamu.edu

**Siamak Zamani Dadaneh**  
Texas A&M University  
siamak@tamu.edu

**Alireza Karbalayghareh**  
Texas A&M University  
alireza.kg@tamu.edu

**Mingyuan Zhou**  
University of Texas at Austin  
Mingyuan.Zhou@mcombs.utexas.edu

**Xiaoning Qian**  
Texas A&M University  
xqian@ece.tamu.edu

## A Gibbs sampling inference for BMDL

We provide the detailed Gibbs sampling procedure by exploiting the augmentation techniques for negative binomial (NB) factor analysis in Zhou and Carin [2015].

**Sampling  $\phi_{vk}$  and  $\theta_{kj}^{(d)}$ :** The NB random variable  $n \sim \text{NB}(r, p)$  can be generated from a compound Poisson distribution:

$$n = \sum_{t=1}^{\ell} u_t, \quad u_t \sim \text{Log}(p), \quad \ell \sim \text{Pois}(-r \ln(1-p)),$$

where  $u \sim \text{Log}(p)$  corresponds to the logarithmic random variable [Johnson et al., 2005], with the probability mass function (pmf)  $f_U(u) = -\frac{p^u}{u \ln(1-p)}$ ,  $u = 1, 2, \dots$ . As shown in Zhou and Carin [2015], given  $n$  and  $r$ , the distribution of  $\ell$  is a Chinese Restaurant Table (CRT) distribution:  $(\ell|n, r) \sim \text{CRT}(n, r)$ , a random variable from which can be generated as  $\ell = \sum_{t=1}^n b_t$ , with  $b_t \sim \text{Bernoulli}(\frac{r}{r+t-1})$ .

Utilizing the above data augmentation technique, for each observed count  $n_{vj}^{(d)}$ , a latent count is sampled as

$$(\ell_{vj}^{(d)} | -) \sim \text{CRT} \left( n_{vj}^{(d)}, \sum_{k=1}^K \phi_{vk} \theta_{kj}^{(d)} \right). \quad (1)$$

These counts can further split into latent sub-counts [Zhou, 2018] using a multinomial distribution:

$$(\ell_{vj1}^{(d)}, \dots, \ell_{vjK}^{(d)} | -) \sim \text{Mult} \left( \ell_{vj}^{(d)}; \frac{\phi_{v1} \theta_{1j}^{(d)}}{\sum_{k=1}^K \phi_{vk} \theta_{kj}^{(d)}}, \dots, \frac{\phi_{vK} \theta_{Kj}^{(d)}}{\sum_{k=1}^K \phi_{vk} \theta_{kj}^{(d)}} \right). \quad (2)$$

These latent counts can be generated as  $\ell_{vj}^{(d)} \sim \text{Pois}(q_j^{(d)} \phi_{vk} \theta_{kj}^{(d)})$ , where  $q_j^{(d)} := -\ln(1-p_j^{(d)})$ . Hence, using the gamma-Poisson conjugacy, and denoting  $\ell_{v.k}^{(\cdot)} = \sum_{d=1}^D \sum_{j=1}^J \ell_{vj}^{(d)}$  and  $\ell_{.jk}^{(d)} = \sum_{v=1}^V \ell_{vj}^{(d)}$ ,  $\phi_{vk}$  and  $\theta_{kj}^{(d)}$  are updated as

$$(\phi_{1k}, \dots, \phi_{V,k} | -) \sim \text{Dir}(\eta + \ell_{1,k}^{(\cdot)}, \dots, \eta + \ell_{V,k}^{(\cdot)}); \quad \theta_{kj}^{(d)} \sim \text{Gamma} \left( r_k^{(d)} + \ell_{.jk}^{(d)}, \frac{1}{c_j^{(d)} - q_j^{(d)}} \right). \quad (3)$$

**Approximation:** Rather than sampling  $\ell_{vj}^{(d)}$  using (1), we can approximate it as follows to further speed up the inference procedure:

$$\begin{aligned}
\text{CRT}(n, r) &= \sum_{i=1}^n \text{Bernoulli}\left(\frac{r}{i-1+r}\right) \\
&= \sum_{i=1}^m \text{Bernoulli}\left(\frac{r}{i-1+r}\right) + \sum_{i=m+1}^n \text{Bernoulli}\left(\frac{r}{i-1+r}\right) \\
&= \text{CRT}(m, r) + \text{Pois}(\lambda), \\
\lambda &= \sum_{i=1}^n \frac{r}{i-1+r} = r[\psi(n+r) - \psi(m+r)].
\end{aligned} \tag{4}$$

This approximation reduces the computational complexity for sampling all  $\ell_{vj}^{(d)}$  from  $O[\sum_d \sum_v \sum_j n_{vj}^{(d)} K]$  to  $O[\sum_d \sum_v \sum_j \min(n_{vj}^{(d)}, m) K]$ , which can lead to significant computation saving for a large number of genes where large counts  $n_{vj}^{(d)}$  are abundant.

**Sampling  $r_k^{(d)}$ ,  $s_k$ , and  $\gamma_0$ :** Let  $\tilde{p}_j^{(d)} = -q_j^{(d)} / (c_j^{(d)} - q_j^{(d)})$ . Starting with  $\ell_{jk}^{(d)} \sim \text{Pois}(-q_j^{(d)} \theta_{kj}^{(d)})$ , marginalizing out  $\theta_{kj}^{(d)}$  leads to

$$\ell_{jk}^{(d)} \sim \text{NB}(r_k^{(d)}, \tilde{p}_j^{(d)}). \tag{5}$$

Based on the CRT augmentation technique:

$$(\tilde{\ell}_{jk}^{(d)} | -) \sim \text{CRT}(\ell_{jk}^{(d)}, r_k^{(d)}), \tag{6}$$

the Gibbs sampling update for  $r_k^{(d)}$  can be written as

$$(r_k^{(d)} | -) \sim \text{Gamma}\left(z_{kd} s_k + \tilde{\ell}_{.k}^{(d)}, \frac{1}{c_k - \sum_j \ln(1 - \tilde{p}_j^{(d)})}\right). \tag{7}$$

Following a similar procedure for  $s_k$ , first we draw

$$(\tilde{\ell}_k^{(d)} | -) \sim \text{CRT}(\tilde{\ell}_{.k}^{(d)}, s_k), \tag{8}$$

and then we update the conditional posterior of  $s_k$  as

$$(s_k | -) \sim \text{Gamma}\left(\gamma_0/K + \sum_d \tilde{\ell}_k^{(d)}, \frac{1}{c_0 - \tilde{q}_k}\right), \tag{9}$$

where  $\tilde{q}_k := \sum_d z_{kd} \sum_j \ln(1 - \tilde{p}_j^{(d)})$ . Similarly, we can update posterior of  $\gamma_0$  as

$$(\ell_k | -) \sim \text{CRT}(\sum_d \tilde{\ell}_k^{(d)}, \gamma_0/K), \quad (\gamma_0 | -) \sim \text{Gamma}\left(a_0 + \ell_{.k}, \frac{1}{b_0 - \sum_k \ln(1 - \tilde{q}_k)/K}\right). \tag{10}$$

**Sampling  $z_{kd}$ :** Denote  $\tilde{q}_k^{(d)} := -\sum_j \ln(1 - \tilde{p}_j^{(d)}) / (c_k - \sum_j \ln(1 - \tilde{p}_j^{(d)}))$ . Starting with  $\tilde{\ell}_{.k}^{(d)} \sim \text{Pois}(-z_{kd} s_k \sum_j \ln(1 - \tilde{p}_j^{(d)}))$ , marginalizing out  $s_k$  leads to  $\tilde{\ell}_{.k}^{(d)} \sim \text{NB}(z_{kd} s_k, \tilde{q}_k^{(d)})$ . We can write

$$\begin{aligned}
Pr(z_{kd} | \tilde{\ell}_{.k}^{(d)} = 0) &\propto Pr(\tilde{\ell}_{.k}^{(d)} = 0 | z_{kd}) Pr(z_{kd}) \propto (\tilde{q}_k^{(d)})^{z_{kd} s_k} \pi_k^{z_{kd}} (1 - \pi_k)^{1 - z_{kd}} \\
&\propto ((\tilde{q}_k^{(d)})^{s_k} \pi_k)^{z_{kd}} (1 - \pi_k)^{1 - z_{kd}},
\end{aligned} \tag{11}$$

and thus we have  $Pr(z_{kd} | \tilde{\ell}_{.k}^{(d)} = 0) \sim \text{Bernoulli}\left(\frac{(\tilde{q}_k^{(d)})^{s_k} \pi_k}{(\tilde{q}_k^{(d)})^{s_k} \pi_k + (1 - \pi_k)}\right)$ . Therefore, we can update  $z_{kd}$  as

$$(z_{kd} | -) \sim \delta(\tilde{\ell}_{.k}^{(d)} = 0) \text{Bernoulli}\left(\frac{(\tilde{q}_k^{(d)})^{s_k} \pi_k}{(\tilde{q}_k^{(d)})^{s_k} \pi_k + (1 - \pi_k)}\right) + \delta(\tilde{\ell}_{.k}^{(d)} > 0). \tag{12}$$

**Sampling  $\eta$ :** To derive the update steps for Dirichlet hyperparameters, the likelihood for  $\phi_k$  is

$$\mathcal{L}(\phi_k) \propto \prod_k \text{Mult}(\ell_{1,k}^{(\cdot)}, \dots, \ell_{V,k}^{(\cdot)}; \ell_{\cdot,k}^{(\cdot)}, \phi_k). \quad (13)$$

Marginalizing out  $\phi_k$  from (13), the likelihood for  $\eta$  can be expressed as

$$\mathcal{L}(\eta) \propto \prod_k \text{DirMult}(\ell_{1,k}^{(\cdot)}, \dots, \ell_{V,k}^{(\cdot)}; \ell_{\cdot,k}^{(\cdot)}, \eta, \dots, \eta). \quad (14)$$

where DirMult denotes the Dirichlet-Multinomial distribution [Zhou, 2018]. The product of  $\mathcal{L}(\eta)$  and  $\prod_k \text{Beta}(q_k; \ell_{\cdot,k}^{(\cdot)}, \eta V)$  can be expressed as

$$\mathcal{L}(\eta) \text{Beta}(q_k; \ell_{\cdot,k}^{(\cdot)}, \eta V) \propto \prod_k \prod_v \text{NB}(\ell_{v,k}^{(\cdot)}; \eta, q_k), \quad (15)$$

we can further apply the data augmentation technique for the NB distribution of Zhou and Carin [2015] to derive the closed-form updates for  $\eta$  as

$$\begin{aligned} (q_k | -) &\sim \text{Beta}(\ell_{\cdot,k}^{(\cdot)}, \eta V), \quad u_{vk} \sim \text{CRT}(\ell_{v,k}^{(\cdot)}, \eta), \\ (\eta | -) &\sim \text{Gamma} \left( s_0 + \sum_{k,v} u_{kv}, \frac{1}{w_0 - V \sum_k \ln(1 - q_k)} \right) \end{aligned} \quad (16)$$

**Sampling  $p_j^{(d)}$ :** Using appropriate conditional conjugacy, we can sample the remaining parameters:

$$(p_j^{(d)} | -) \sim \text{Beta}(a_0 + \sum_v n_{vj}^{(d)}, b_0 + \sum_k \theta_{jk}^{(d)}). \quad (17)$$

## References

- N. L. Johnson, A. W. Kemp, and S. Kotz. *Univariate discrete distributions*, volume 444. John Wiley & Sons, 2005.
- M. Zhou. Nonparametric Bayesian negative binomial factor analysis. *Bayesian Analysis*, pages 1061–1089, 2018.
- M. Zhou and L. Carin. Negative binomial process count and mixture modeling. *IEEE Transactions on Pattern Analysis and Machine Intelligence*, 37(2):307–320, 2015.
